# Supplementary material
Source: publisher figshare collection journal article supplement (https://tandf.figshare.com/ndownloader/files/21898341)
Supplement: Supplementary file 1 [file 21898341]

## Supplemental Table S1

### *The social validity questionnaire*

1: Strongly Disagree/Dissatisfied; 2: Disagree/Dissatisfied; 3: Neutral/no opinion;  
4: Agree/Satisfied, 5: Strongly Agree/Satisfied

|    | Item\Rating                                                              | 1 | 2 | 3 | 4 | 5 |
|----|--------------------------------------------------------------------------|---|---|---|---|---|
| 1  | The content of the intervention was developmentally appropriate.         |   |   |   |   |   |
| 2  | The intervention met the needs of my child.                              |   |   |   |   |   |
| 3  | The content of the intervention is culturally appropriate.               |   |   |   |   |   |
| 4  | The format (1:1) was suitable for my child.                              |   |   |   |   |   |
| 5  | The qualification of the instructors was adequate.                       |   |   |   |   |   |
| 6  | The duration of the intervention sessions was appropriate.               |   |   |   |   |   |
| 7  | The location of the intervention was appropriate.                        |   |   |   |   |   |
| 8  | The frequency of intervention was acceptable.                            |   |   |   |   |   |
| 9  | Participation in the intervention did not increase my financial burden.  |   |   |   |   |   |
| 10 | Travel time for the intervention was manageable.                         |   |   |   |   |   |
| 11 | I'm satisfied with the overall progress of my child's play skills.       |   |   |   |   |   |
| 12 | I'm satisfied with the improvement of my child's play skills in a group. |   |   |   |   |   |
| 13 | I'm satisfied with the overall results of the intervention.              |   |   |   |   |   |
| 14 | I will recommend this intervention to other parents.                     |   |   |   |   |   |

15. Please share your child's experiences about the intervention, or do you have any suggestions to improve the instruction?

---
